# Supplementary material for: Disruption of a Novel Krüppel-like Transcription Factor p300-regulated Pathway for Insulin Biosynthesis Revealed by Studies of the c.-331 INS Mutation Found in Neonatal Diabetes Mellitus
Source: PubMed Central journal article supplement — J Biol Chem. 2011 May 18;286(32):28414–24. doi: 10.1074/jbc.M110.215822 (PMC3151084; doi:10.1074/jbc.m110.215822), 2011-05-18
Supplement: supp_M110.215822_jbc.M110.215822-1.pdf [file supp_M110.215822_jbc.M110.215822-1.pdf]

**Supplementary Table 1:** Clinical characteristics of the six NDM subjects sequenced for the *INS* promoter, negative for any missense mutations in *KCNJ11*, *ABCC8* and *INS*, or chromosome 6q24 abnormalities.

| <b>Proband-</b>                                  | <b>1</b>     | <b>2</b> | <b>3</b> | <b>4</b>                                                                                 | <b>5</b> | <b>6</b>               |
|--------------------------------------------------|--------------|----------|----------|------------------------------------------------------------------------------------------|----------|------------------------|
| Sex                                              | F            | F        | F        | M                                                                                        | M        | M                      |
| Ethnic group                                     | Turkish      | Turkish  | Morocco  | Algeria                                                                                  | Iraq     | Iraq                   |
| Birth weight (g/percentile)                      | 1540/<3      | 1760/<3  | 1890/<3  | 2890/<2                                                                                  | NA       | 2240/<3                |
| Gestation (wk)                                   | 37           | 40       | 37       | 39                                                                                       | 42       | 41                     |
| <b>Status at presentation</b>                    |              |          |          |                                                                                          |          |                        |
| NDM onset<br>(d [days] m[months] or<br>Y[years]) | 1d           | 2d       | 11d      | 3Y4m                                                                                     | 1d       | 31d                    |
| Presentation                                     | SGM          | SGM      | SGM      | SPUPD and weight<br>loss                                                                 | NA       | SGM and<br>weight loss |
| Blood glucose (mmol/l)                           | 14.8         | 10       | 28.8     | 72                                                                                       | NA       | 10.7                   |
| Antibodies                                       | 0            | 0        | 0        | NA                                                                                       | 0        | NA                     |
| Pancreatic<br>ultrasonography                    | N            | N        | N        | NA                                                                                       | Aplasia  | Agenesis               |
| Neuropsychological<br>assessment                 | N            | N        | N        | Mental retardation                                                                       | N        | N                      |
| Other manifestations                             | No           | No       | Asthma   | Macrocrania,<br>megalencephalia,<br>renal malformation,<br>dysmorphism,<br>visual defect | NA       | Skeletal<br>dysplasia  |
| <b>Age at remission</b><br>(m[months])           | 5m /<br>24m  | 1.5m     | NA       | NA                                                                                       | NA       | NA                     |
| <b>Age at recurrence</b><br>(m[months])          | 22m /<br>28m | NA       | NA       | NA                                                                                       | NA       | NA                     |
| <b>Current status</b>                            |              |          |          |                                                                                          |          |                        |
| Age<br>(m[months] or Y[years])                   | 28m          | 8Y3m     | 7Y7m     | 16Y                                                                                      | 16Y6m    | 6Y3m                   |
| Weight (kg/percentile)                           | 11.8/50      | NA       | 21.5/25  | 50.6/10                                                                                  | 48.3/3   | NA                     |
| Type of insulin therapy                          | Injection    | NA       | Pump     | Injection                                                                                | Pump     | Pump                   |
| Dose (units/day)                                 | 1.2          | NA       | 20       | 50                                                                                       | NA       | NA                     |
| Dose (units/kg/day)                              | 0.08         | NA       | 0.9      | 1                                                                                        | NA       | NA                     |
| HbA1c in % (nl<5,9%)                             | 6.2          | NA       | 8.5      | 8                                                                                        | 7.3      | 6.7                    |

**NA:** not available / **N:** normal

**SGM:** systematic glucose monitoring / **SPUPD:** polyuria-polydipsia

**Supplementary Table 2:** Clinical and metabolic characteristics of the Family-1.

| <b>Family-1</b>                                                | <b>Proband</b>      |               | <b>Sister</b>  | <b>Father</b>  | <b>Mother</b>  | <b>Paternal grandfather</b> | <b>Paternal grandmother</b> |
|----------------------------------------------------------------|---------------------|---------------|----------------|----------------|----------------|-----------------------------|-----------------------------|
| Sex                                                            | F                   |               | F              | M              | F              | M                           | F                           |
| Ethnic group                                                   | Turkish             |               | Turkish        | Turkish        | Turkish        | Turkish                     | Turkish                     |
| <b>Current status</b>                                          |                     |               |                |                |                |                             |                             |
| Age (m[months] or y[years])                                    | 28m                 |               | 4y             | 26y            | 28y            | 53Y                         | 51Y                         |
| BMI (kg.m <sup>-2</sup> /percentile)                           | 15.4/10             |               | 15.2/50        | 27.8           | 20.6           | 30                          | 37                          |
| History of diabetes                                            | Yes                 |               | No             | No             | No             | Yes                         | Yes                         |
| Insulin treatment                                              | Yes                 |               | No             | No             | No             | No                          | No                          |
| Oral anti-diabetic drugs                                       | No                  |               | No             | No             | No             | Biguanide                   | Biguanide + Sulfonylureas   |
| HbA1c (%)                                                      | 5.4-5.6 / 6.6-6.2 * |               | 5.1            | 5.2            | 4.7            | 6.9                         | 7.3                         |
| Neuropsychological assessment                                  | N                   |               | N              | N              | N              | N                           | N                           |
| <b>Oral glucose tolerance test</b>                             | <b>NB1</b>          | <b>NB2</b>    |                |                |                |                             |                             |
| <b>T0:</b> Glucose (mmol/l)/Insulin (mUI/l)/ Peptide C (ng/ml) | 2.8 / 2 / 0.7       | 2.8 / 1 / 0.3 | 3.6 / NA / 1.1 | 4.7 / 6 / 1.6  | 4.2 / 5 / 1.6  | NA                          | NA                          |
| <b>T30:</b> Glucose/Insulin/Peptide C                          | 7 / 9 / 1.8         | 6.4 / 6 / 0.8 | NA             | 8 / 70 / 7.4   | 6.2 / 34 / 3.8 | NA                          | NA                          |
| <b>T60:</b> Glucose/Insulin/Peptide C                          | 7.4 / 11 / 2.1      | 7.2 / 6 / 0.7 | NA             | 7.7 / 57 / 7.5 | 6 / 32 / 5     | NA                          | NA                          |
| <b>T90:</b> Glucose/Insulin/Peptide C                          | 6.7 / 13 / 2.2      | 5.7 / 4 / 0.9 | NA             | 6.4 / 37 / 6.9 | 7.8 / 51 / 7.8 | NA                          | NA                          |
| <b>T120:</b> Glucose/Insulin/Peptide C                         | 2.8 / 3 / 1         | 6.5 / 4 / 0.9 | NA             | 6 / 38 / 5.7   | 7.5 / 50 / 7.4 | NA                          | NA                          |
| <b>T180:</b> Glucose/Insulin/Peptide C                         | 3.2 / 2 / 0.7       | 5.1 / 4 / 0.8 | NA             | 6 / 41 / 7.2   | 7.2 / 51 / 8.7 | NA                          | NA                          |
| <b>Proinsulin (pmol/l) / Proinsulin-Insulin ratio (%)</b>      | <b>NB1</b>          | <b>NB2</b>    |                |                |                |                             |                             |
| <b>T0 [2.5 – 14 / 5 – 50]<sup>†</sup></b>                      | 1.7 / 5.6           | NA            | 2.1 / 9.5      | 5.1 / 20       | 2.5 / 2.6      | NA                          | NA                          |
| <b>T30 [8.5 – 56 / 4 – 24]<sup>†</sup></b>                     | 3.9 / 18            | NA            | 6.7 / 12       | 18.8 / 7       | 5.9 / 5        | NA                          | NA                          |
| <b>T120 [12 – 70 / 12 – 76]<sup>†</sup></b>                    | 3.4 / 28            | NA            | 9.9 / 41       | 25.6 / 18      | 18.4 / 10      | NA                          | NA                          |

\* HbA1C at TNDM remissions / HbA1c at diabetes recurrences

<sup>†</sup> [normal values] (personal communication from Dr. Didier Chevenne [Robert-Debré Hospital, Paris, France])

NA: not available / N: normal

NB1: measurement performed during the first remission phase (with no insulin treatment)

NB2: measurement performed during the second remission phase (with no insulin treatment)

**Supplemental Table 3:** Expression of all the *KLF* genes in human islets (n = 3) and sorted beta cells (n = 3), through microarray

| Gene                | Human beta cells                          |                                           | Human islets                          |                                       |
|---------------------|-------------------------------------------|-------------------------------------------|---------------------------------------|---------------------------------------|
|                     | Median level of expression (MLE $\beta$ ) | % genes which level is below (E $\beta$ ) | Median level of expression (MLE $i$ ) | % genes which level is below (E $i$ ) |
| <i>KLF1</i>         | NE                                        | NE                                        | NE                                    | NE                                    |
| <b><i>KLF2</i></b>  | <b>659.8</b>                              | <b>74%</b>                                | <b>2581.7</b>                         | <b>93%</b>                            |
| <i>KLF3</i>         | 48.5                                      | 30%                                       | 48.9                                  | 33%                                   |
| <b><i>KLF4</i></b>  | <b>245.2</b>                              | <b>46%</b>                                | <b>960.4</b>                          | <b>80%</b>                            |
| <b><i>KLF5</i></b>  | <b>380.2</b>                              | <b>59%</b>                                | <b>439.9</b>                          | <b>61%</b>                            |
| <b><i>KLF6</i></b>  | <b>1839.6</b>                             | <b>90%</b>                                | <b>3532.0</b>                         | <b>95%</b>                            |
| <i>KLF7</i>         | 12.9                                      | 5%                                        | NE                                    | NE                                    |
| <i>KLF8</i>         | NE                                        | NE                                        | NE                                    | NE                                    |
| <b><i>KLF9</i></b>  | <b>386.8</b>                              | <b>59%</b>                                | <b>690.3</b>                          | <b>73%</b>                            |
| <i>KLF10</i>        | 53.1                                      | 5%                                        | NE                                    | NE                                    |
| <b><i>KLF11</i></b> | <b>339.5</b>                              | <b>55%</b>                                | <b>358.3</b>                          | <b>55%</b>                            |
| <i>KLF12</i>        | NE                                        | NE                                        | NE                                    | NE                                    |
| <b><i>KLF13</i></b> | <b>507.8</b>                              | <b>67%</b>                                | <b>551.1</b>                          | <b>67%</b>                            |
| <i>KLF14</i>        | NE                                        | NE                                        | NE                                    | NE                                    |
| <i>KLF15</i>        | 14.5                                      | 6%                                        | 20.2                                  | 16%                                   |
| <i>KLF16</i>        | NE                                        | NE                                        | NE                                    | NE                                    |

**NE:** not expressed

## Supplementary Figure 1:

A.

| Unigene   | Symbol  | Description                                                           | Adipose | Muscle |
|-----------|---------|-----------------------------------------------------------------------|---------|--------|
| Mm.717    | Pgk2    | Phosphoglycerate kinase 2                                             | 64.5    | 3.5    |
| Mm.212889 | Phka1   | Phosphorylase kinase alpha 1                                          | 4.4     | 1.7    |
| Mm.30494  | Mdh1b   | Malate dehydrogenase 1B, NAD (soluble)                                | 3.8     | -1.2   |
| Mm.282039 | Aclb    | ATP citrate lyase                                                     | 3.7     | -1.2   |
| Mm.390201 | Pgm3    | Phosphoglucomutase 3                                                  | 3.6     | 1.4    |
| Mm.22519  | Rbks    | Ribokinase                                                            | 3.0     | -1.1   |
| Mm.423078 | Fbp1    | Fructose bisphosphatase 1                                             | 3.0     | 2.1    |
| Mm.34411  | Pdk1    | Pyruvate dehydrogenase kinase, isoenzyme 1                            | 2.3     | -1.5   |
| Mm.3131   | Did     | Dihydrolipoamide dehydrogenase                                        | -2.0    | -1.4   |
| Mm.198138 | Sdhc    | Succinate dehydrogenase complex, subunit C, integral membrane protein | -2.0    | -1.6   |
| Mm.29182  | Taldo1  | Transaldolase 1                                                       | -2.0    | 1.2    |
| Mm.217764 | Pgm2    | Phosphoglucomutase 2                                                  | -2.1    | 1.6    |
| Mm.301527 | Pdhb    | Pyruvate dehydrogenase (lipoamide) beta                               | -2.6    | -1.8   |
| Mm.391871 | Fbp2    | Fructose bisphosphatase 2                                             | -2.5    | 1.7    |
| Mm.392905 | Cs      | Citrate synthase                                                      | -2.6    | -1.6   |
| Mm.79179  | Prps11f | Phosphoribosyl pyrophosphate synthetase 1-like 1                      | -2.8    | -5.9   |
| Mm.29098  | Galm    | Galactose mutarotase                                                  | -5.0    | 2.2    |
| Mm.383180 | Pklr    | Pyruvate kinase liver and red blood cell                              | -3.4    | -1.2   |
| Mm.279195 | Idh3a   | Isocitrate dehydrogenase 3 (NAD+) alpha                               | -3.7    | -1.3   |
| Mm.3913   | Eno2    | Enolase 2, gamma neuronal                                             | -4.1    | 5.8    |
| Mm.275975 | Gys2    | Glycogen synthase 2                                                   | -4.2    | -1.2   |
| Mm.396102 | Gbe1    | Glucan (1,4-alpha)-, branching enzyme 1                               | -4.3    | -2.9   |
| Mm.246432 | Idh2    | Isocitrate dehydrogenase 2 (NADP+), mitochondrial                     | -4.4    | -13.3  |
| Mm.1845   | Pcx     | Pyruvate carboxylase                                                  | -4.5    | 2.5    |
| Mm.9925   | Idh1    | Isocitrate dehydrogenase 1 (NADP+), soluble                           | -5.1    | -1.5   |
| Mm.287178 | Prps1   | Phosphoribosyl pyrophosphate synthetase 1                             | -5.5    | -1.4   |
| Mm.22183  | H6pd    | Hexose-6-phosphate dehydrogenase (glucose 1-dehydrogenase)            | -6.2    | 2.0    |
| Mm.29768  | Pdk2    | Pyruvate dehydrogenase kinase, isoenzyme 2                            | -6.5    | -6.6   |
| Mm.275654 | Gys1    | Glycogen synthase 1, muscle                                           | -6.6    | -1.6   |
| Mm.235547 | Pdk4    | Pyruvate dehydrogenase kinase, isoenzyme 4                            | -14.5   | -3.0   |
| Mm.477474 | Pck1    | Phosphoenolpyruvate carboxykinase 1, cytosolic                        | -16.4   | -3.7   |
| Mm.3159   | Phkg1   | Phosphorylase kinase gamma 1                                          | -27.9   | 1.3    |
| Mm.18064  | G6pc    | Glucose-6-phosphatase, catalytic                                      | 1.0     | 3.5    |

B.

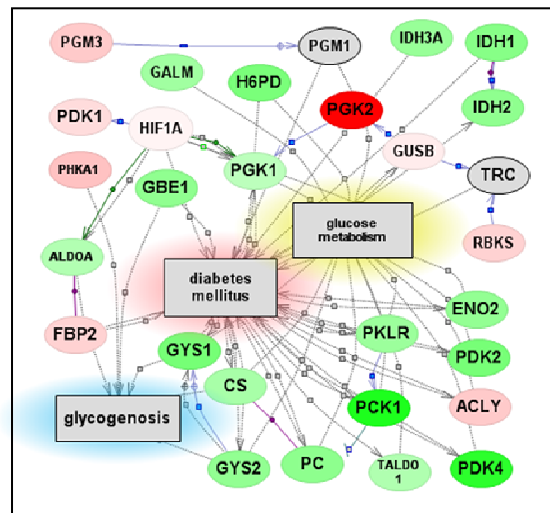

**Supplementary Figure 1:** *Klf11*<sup>-/-</sup> mice display alterations in metabolic enzymes in adipose tissue. Data from global expression profiling (GeneChip, Affymetrix®, Santa Clara, CA) obtained from both wild-type and *Klf11*<sup>-/-</sup> adipose tissue was filtered using the Pathway Studio® software (Ariadne Genomics, Inc., Rockville, MD) to detect alterations in diabetes-associated genes or those involved in glucose metabolism. **A.** Metabolic genes, differentially expressed in *Klf11* knock-out (KO)/wild-type (WT) mice are shown as fold-change of expression in *Klf11* knock-out (KO)/wild-type (WT) mice. Gene symbols and Unigene numbers are also provided. **B.** Processing of expression data using the Pathway Studio® pathway reconstruction algorithm illustrates how these genes are linked in single pathway that converge on two relevant processes, glucose metabolism/glycogenesis and diabetes (grey boxes). Shades of green indicate genes that were down-regulated in the *Klf11*<sup>-/-</sup> animals compared to wild-type, whereas shades of red illustrate genes that were up-regulated in *Klf11*<sup>-/-</sup> versus wild-type. Grey circles represent 2 nodes (PGM1 and TRC) automatically added by Pathway Studio® to link the pathway. These results demonstrate that, in addition to defective insulin transcription in the pancreas, *Klf11*<sup>-/-</sup> mice also display alterations in gene expression within peripheral tissue.
